(2 vols., Leipzig, 1835). It places in ready circulation the travel notes of a very perceptive German natural scientist. Excellently trained in medicine at Leipzig and widely traveled in Europe, Cuba, and the United States, Eduardo Poeppig provides a wealth of detail for the early history of Chile, not only of physical aspects but also of social and political problems. Poeppig's biographer, the German geographer Friedrich Ratzel, called his descriptions superior to those of Humboldt, and they certainly justify placing them alongside Humboldt as an inspired and faithful student of the New World. Justifiable also is the claim of his translator that much of the history of the 1820s will have to be rewritten on the basis of a better knowledge of his work. Among historians only José Toribio Medina has utilized extensively his findings. What will particularly attract the student of Chile is that this is no travelogue written from the vantage point of Santiago or Valparaiso or based on a few conversations with Chilean statesmen and politicians. Rather it is a portrait of the countryside and of Chile from south to north and is based on contact with the people, including the most humble. The translator has added valuable aids: occasional notes of clarification on political or economic detail; a wide selection of sketches by Juan Mauricio Rugendas dating from the 1830s and numerous photographs taken by the translator himself; and a long index of proper names, places, and subjects.

*El doctor José Barros Pazos en la patria y en el exilio (1808-1877)*. By MARÍA CELINA BARROS Y ARANA. Buenos Aires, 1963. Instituto de Historia Argentina de la Facultad de Filosofía y Letras de la Universidad Nacional de Buenos Aires. Pp. 328.

Through painstaking research in family and public archives a granddaughter has restored one of the secondary figures of Argentina's period of national organization to full historical splendor. After a Chilean exile

in the 1840s, Barros Pazos returned to Buenos Aires to become director of schools, a post subsequently filled with more flamboyancy by Domingo F. Sarmiento, and rector of the university, also later occupied with more fame by Juan María Gutiérrez. Along with most of this post-Rosas generation he also had an active political career as delegate to the provincial conventions of 1854 and 1860 as minister of government under Valentín Alsina, as member of the Supreme Court in 1862 under Mitre's presidency, and finally just before his death as president of that court. The writer has delved beneath the surface, however, to uncover in personal letters and papers the poems and anecdotes of the private man. In such a combination lies the strength of this excellent biography.

*Política exterior argentina, 1930-1962*.

By ALBERTO CONIL PAZ and GUSTAVO FERRARI. Buenos Aires, 1964. Huemul. Bibliography. Index. Pp. 277.

This "manual," so the authors hope in their preface, will supply basic information on Argentine foreign relations now so unsatisfactorily provided for in pamphlets, a few out-of-print foreign works, and several Argentine juridical treatises. Within this framework the book successfully completes its mission. A clear, concise narrative carries the reader through the implications for Argentina of the Depression, the Second World War, the *peronista* "Third Position," and the present deadlock between East and West. Of particular interest are lengthy discussions of the Roca-Runciman Pact, Lend-Lease consultations with the United States in 1941-42, Hull's violent pressures on Argentina in 1943-44, postwar relations with England, and Arturo Frondizi's policies toward Fidel Castro. The authors attempt to keep their private biases in the background although it is clear that they are nationalists and conservatives. A broadly selected bibliography makes

up for the lack of footnotes in the text. Curiously absent, however, is Sergio Bagú, *Argentina en el mundo* (1961).

*Esau and Jacob*. By MACHADO DE ASSIS. Translated and with an introduction by HELEN CALDWELL. Berkeley, 1965. University of California Press. Pp. 287. \$5.00.

This novel will interest the social more than the political historian, for the echoes of governmental upsets and occasional gun volleys at the turn of the ninth decade fall upon the reader's senses lightly. "I favored the churches, no friends asked for the use of the police but what I granted it," one inept politician sighs. "I brought twenty persons to trial, others went to jail without trial. Was I supposed to *hang* people?" (p. 74). His daughter's affections are sought by the twin sons of an imperial banker-baron. One favors the monarchy, the other the republic. As it must turn out in Machado's Brazil, order does not preclude progress, nor does progress order.

The infants' mother learns of their destiny for greatness from a *cabocla* fortune teller. Disdaining "childish beliefs," (p. 44) the father turns to and gets the same message from a spiritualistic medium ("put a wand in his hand and you would have a sorcerer") in a finely ironic scene (p. 37). Both baroness and baron, then, are conventional *sobrado* types—eclectic, church-going bourgeois of the last quarter of the nineteenth century. The climax of the story of the damsel and the twins, told by a world-weary ex-diplomat, comes not when Pedro and Paulo successfully stand for election as deputies in opposing parties but rather when Flora (Brazil?) dies, incapable to the last of choosing between them.

Very well translated, *Esau and Jacob* is chock-full of *carioca* culture,

gentle satire, social vignettes, and Machadian tag lines.

DONALD WARREN, JR.  
New York, N. Y.

## OTHER BOOKS RECEIVED

*Narrative of Voyages and Excursions on the East Coast and in the Interior of Central America*. By ORLANDO W. ROBERTS. Edited by HUGH CRAGGS. Gainesville, 1965. University of Florida Press. Illustrations. Appendix. Index. Pp. 302, 9.

*Waikna; or Adventures on the Mosquito Shore*. By EPHRAIM GEORGE SQUIER. Edited by DANIEL E. ALLEGER. Gainesville, 1965. University of Florida Press. Illustrations. Appendix. Index. Pp. 366. \$9.00.

These are facsimile reproductions of travel books originally published in 1827 and 1855 respectively.

*A Century of Latin American Thought*. By W. REX CRAWFORD. New York, 1966. Frederick A. Praeger. Paperback U-606. Notes. Bibliography. Index. Pp. 322. \$2.50.

*Baroque Times in Old Mexico*. By IRVING A. LEONARD. Ann Arbor, 1966. University of Michigan Press. Ann Arbor Paperbacks AA110. Notes. Bibliography. Index. Pp. xi, 260. \$1.95.

*The Portable Prescott; the Rise and Decline of the Spanish Empire*. Edited by IRWIN R. BLACKER. New York, 1966. The Viking Press. Viking Portable Library P66. Bibliography. Pp. vii, 568. \$1.85.

*Imperial Spain, 1469-1716*. By J. H. ELLIOTT. New York, 1966. New American Library. Mentor Book MQ664. Illustrations. Bibliography. Index. Pp. viii, 406. \$95.

These works are now reprinted in paperback form without any changes from earlier editions. They were reviewed in *HAHR* in November 1944, August 1960, August 1964, and May 1965 respectively.
